# Supplementary material for: A polyaniline nanofiber array supported ultrathin polyamide membrane for solar-driven volatile organic compound removal
Source: Royal Society of Chemistry journal article supplement (doi:10.1039/d2ta04909k), 2022-01-01
Supplement: d2ta04909k1.pdf [file d2ta04909k1.pdf]

## Supporting Information

# Polyaniline nanofiber array supported ultrathin polyamide membrane for solar-driven volatile organic compounds removal

Xian Wei<sup>a</sup>, Yubing Peng<sup>a</sup>, Wangxi Fang<sup>b</sup>, Zhenyu Hu<sup>c,d</sup>, Wenwei Li<sup>c,d</sup>, Shenxiang Zhang<sup>\*a</sup>, Jian Jin<sup>\*a</sup>

<sup>a</sup>College of Chemistry, Chemical Engineering and Materials Science; Collaborative Innovation Center of Suzhou Nano Science and Technology; Suzhou Key Laboratory of Macromolecular Design and Precision Synthesis, Soochow University, Suzhou, 215123, China

<sup>b</sup>i-Lab, Suzhou Institute of Nano-Tech and Nano-Bionics, Chinese Academy of Sciences, Suzhou, 215123, China

<sup>c</sup>CAS Key Laboratory of Urban Pollutant Conversion, Department of Applied Chemistry, University of Science & Technology of China, Hefei 230026, China

<sup>d</sup>USTC-CityU Joint Advanced Research Center, Suzhou 215123, China

## Supporting Figures

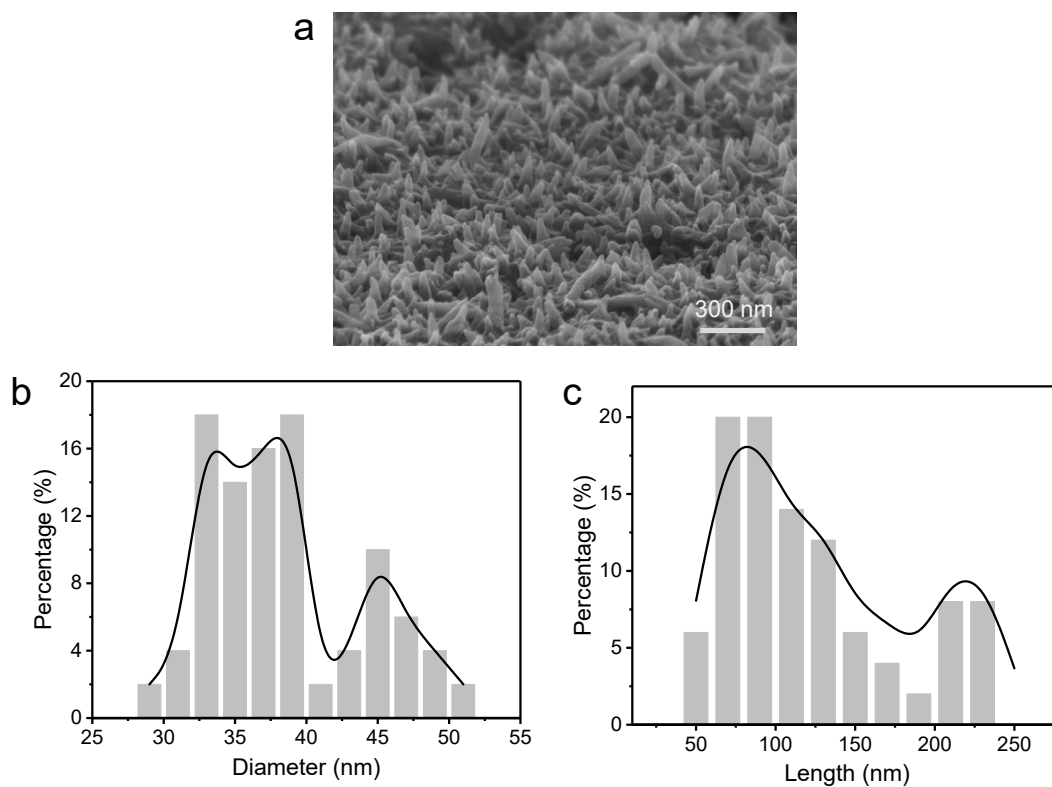

**Fig. S1** a) PANI-m SEM image taken at a 45° tilt. b) Diameter and c) length distribution as measured from the SEM image.

Fig. S1a shows the PANI-m SEM image taken at a 45° tilt from a field emission scanning electron microscopy (Hitachi S8230). We measured the diameter and length of the nanofibers respectively. The diameter of PANI fibers was 30-50 nm and the length was 50-250 nm as statistically obtained from the SEM image.

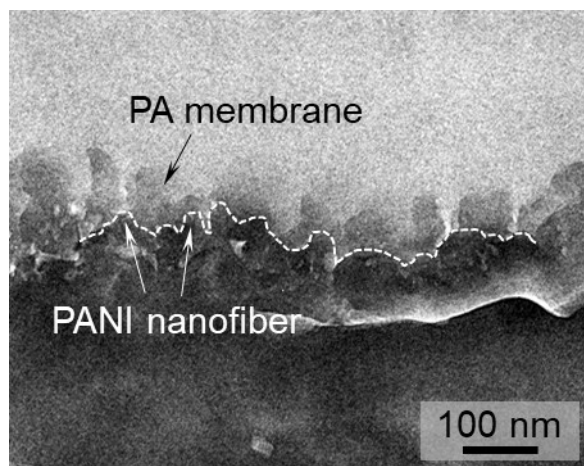

**Fig. S2** Cross-section TEM images of the PANI-PA-8.

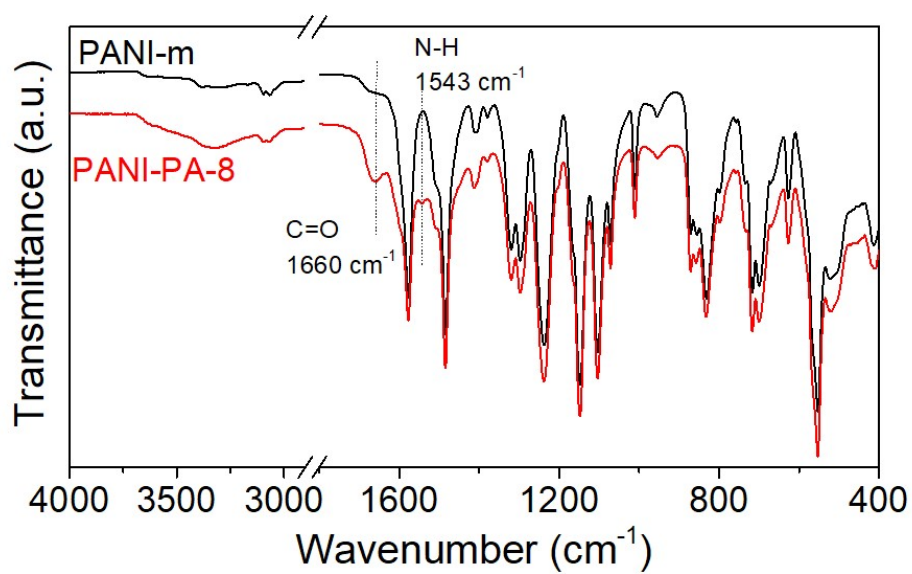

**Fig. S3** FTIR spectra of the PANI-m and PANI-PA-8.

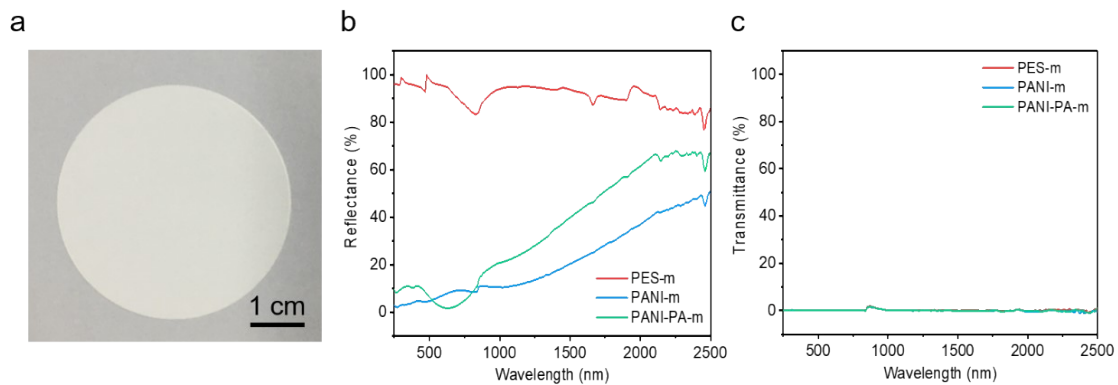

**Fig. S4** a) Photograph of the PES-m. b) Light reflectance and c) light transmittance spectra of different membranes at the wavelength from 250 to 2,500 nm.

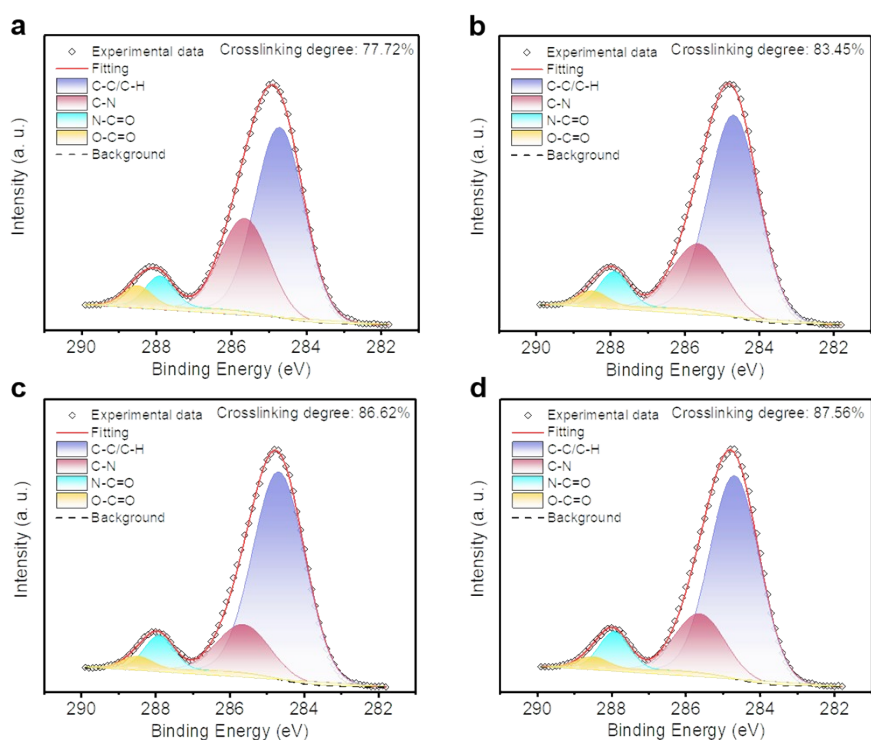

**Fig. S5** C 1s XPS spectra of a) PANI-PA-1, b) PANI-PA-2, c) PANI-PA-4 and d) PANI-PA-8.

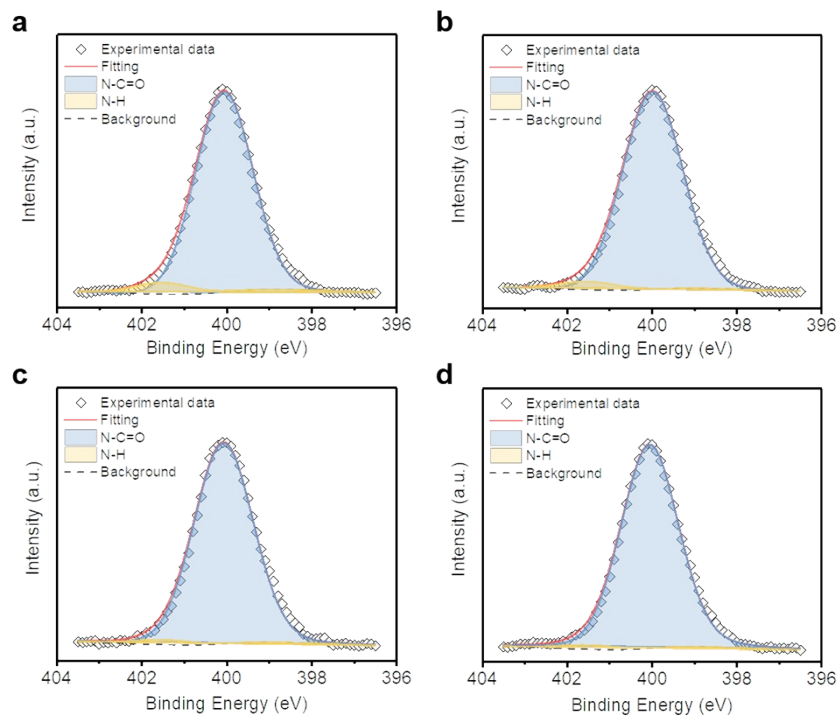

**Fig. S6** N 1s XPS spectra of a) PANI-PA-1, b) PANI-PA-2, c) PANI-PA-4 and d) PANI-PA-8.

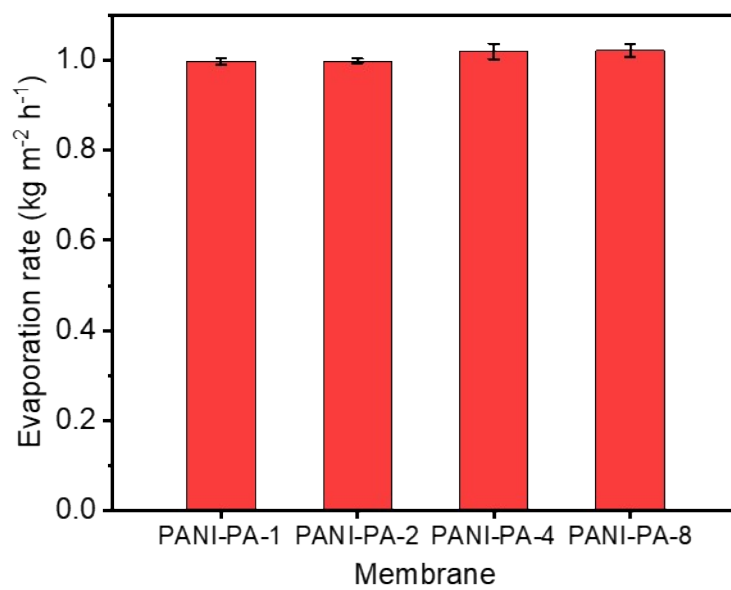

**Fig. S7** Water evaporation rates of the PANI-PA-m under 1 sun irradiation.

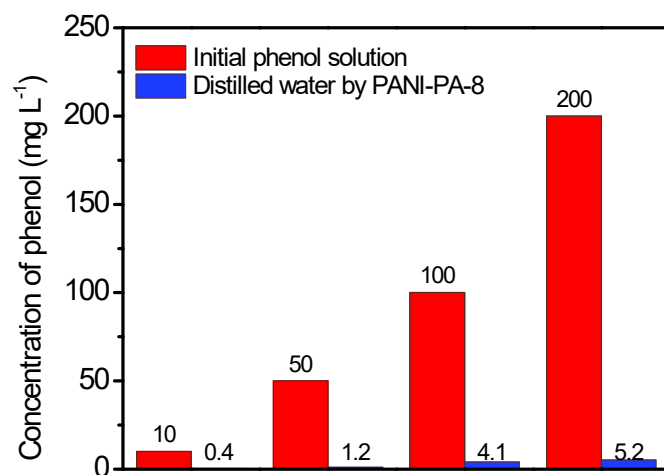

**Fig. S8** Phenol concentration in initial aqueous solution and distilled water by the PANI-PA-8 under 1 sun irradiation.

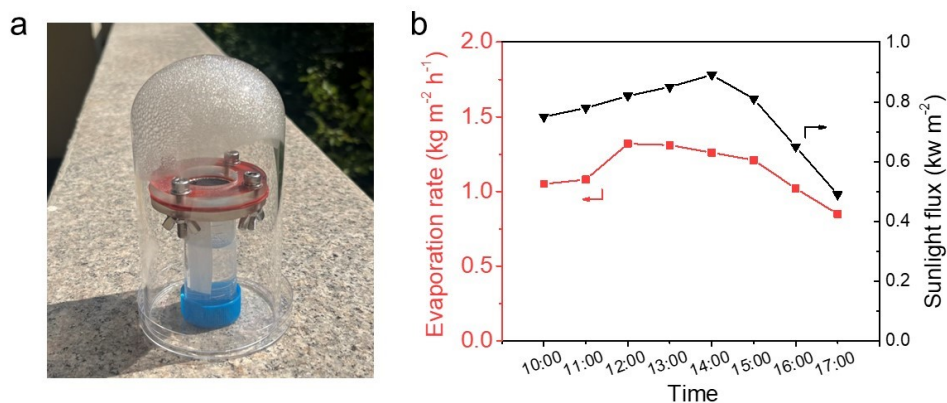

**Fig. S9** a) The picture of outdoor solar-driven VOCs removal device. b) Water evaporation rate and sunlight flux during outdoor solar-driven VOCs experiment.

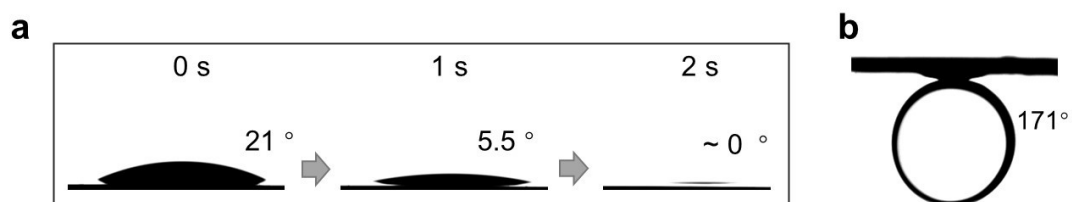

**Fig. S10** a) Time-dependent water contact angle of a water droplet and b) underwater oil contact angle of an isooctane droplet on PANI nanofiber arrays.

## Membrane pore size characterization

The pore size distribution and molecular weight cutoff (MWCO) of the PANI-PA-m were studied by the rejection rate of a series of neutral organic molecules, including glycerol (92 Da), glucose (180 Da), sucrose (342 Da) and raffinose (504 Da). The feed concentration of each species solution was 200 mg L<sup>-1</sup> and the applied pressure was 4 bar. The value of MWCO is defined as the molecular weight of the neutral molecule at which the rejection equals 90%. The pore size distribution of the membrane is derived from stokes radius and probability density function of neutral organic molecules. The stokes radius ( $r_p$ ) is related to the molecular weight of these neutral organic molecules as described in Eq 1:<sup>1</sup>

$$\ln(r_p) = -1.4962 + 0.4654 \ln(MW) \quad (1)$$

Where MW is the molecular weight of each organic solute.

Based on the stokes radius of these molecules, the pore size distribution function can be obtained by Eq 2:<sup>1</sup>

$$\frac{dR(r_p)}{dr_p} = \frac{1}{r_p \ln \sigma_p \sqrt{2\pi}} \exp \left[ -\frac{(\ln r_p - \ln \mu_p)^2}{2(\ln \sigma_p)^2} \right] \quad (2)$$

Where  $\mu_p$  represents the mean effective pore radius,  $\sigma_p$  represents the geometric standard deviation of probability density function, determined at a ratio of  $r_p$  at rejection rate equals 84.13% over that at 50%.

**Table S1.** Surface chemical components of the PANI-PA-m.

| Membrane  | C (%) | Surface chemical species from C1s |         |             | N (%) | Surface chemical species from N1s |         |             | O (%) | Crosslinking degree (%) |
|-----------|-------|-----------------------------------|---------|-------------|-------|-----------------------------------|---------|-------------|-------|-------------------------|
|           |       | B.E. (eV)                         | Species | Content (%) |       | B.E. (eV)                         | Species | Content (%) |       |                         |
| PANI-PA-1 | 73.32 | 284.7                             | C-C/C-H | 44.18       | 13.83 | 400                               | O=C-N   | 13.05       | 12.85 | 77.72                   |
|           |       | 285.6                             | C-N     | 21.67       |       |                                   |         |             |       |                         |
|           |       | 287.9                             | O=C-N   | 4.51        |       |                                   |         |             |       |                         |
|           |       | 288.5                             | O=C-O   | <b>2.96</b> |       | 401.5                             | N-H     | <b>0.78</b> |       |                         |
| PANI-PA-2 | 73.57 | 284.7                             | C-C/C-H | 49.42       | 13.66 | 400                               | O=C-N   | 13.11       | 12.77 | 83.45                   |
|           |       | 285.6                             | C-N     | 17.13       |       |                                   |         |             |       |                         |
|           |       | 287.9                             | O=C-N   | 4.97        |       |                                   |         |             |       |                         |
|           |       | 288.5                             | O=C-O   | <b>2.05</b> |       | 401.5                             | N-H     | <b>0.55</b> |       |                         |
| PANI-PA-4 | 73.80 | 284.7                             | C-C/C-H | 54.37       | 13.92 | 400                               | O=C-N   | 13.59       | 12.28 | 86.62                   |
|           |       | 285.6                             | C-N     | 12.69       |       |                                   |         |             |       |                         |
|           |       | 287.9                             | O=C-N   | 4.97        |       |                                   |         |             |       |                         |
|           |       | 288.5                             | O=C-O   | <b>1.77</b> |       | 401.5                             | N-H     | <b>0.33</b> |       |                         |
| PANI-PA-8 | 73.02 | 284.7                             | C-C/C-H | 50.95       | 14.02 | 400                               | O=C-N   | 13.73       | 12.96 | 87.56                   |
|           |       | 285.6                             | C-N     | 14.81       |       |                                   |         |             |       |                         |
|           |       | 287.9                             | O=C-N   | 5.60        |       |                                   |         |             |       |                         |
|           |       | 288.5                             | O=C-O   | <b>1.66</b> |       | 401.5                             | N-H     | <b>0.29</b> |       |                         |

The crosslinking degree was calculated by the following equation:<sup>2</sup>

$$\text{Crosslinking Degree} = \frac{\text{amide links}}{\text{potential amide links}} = \frac{N - AG}{N + CG}$$

Where N, AG, and CG represent the content of nitrogen, amine groups, and carboxylic groups respectively in the active layer.



**Tab. S2.** Phenol removal performance by using solar-driven process.

| Material              | Mechanism                     | Initial concentration (mg L <sup>-1</sup> ) | Light density (kw m <sup>-2</sup> ) | Water evaporation rate (kg m <sup>-2</sup> h <sup>-1</sup> ) | Removal rate | Reference |
|-----------------------|-------------------------------|---------------------------------------------|-------------------------------------|--------------------------------------------------------------|--------------|-----------|
| Persulfate            | Photo-Fenton reaction         | 1                                           | 5                                   | 2.8                                                          | ~ 50 %       | 3         |
| Polypyrrole           | Solution-diffusion separation | 5                                           | 1                                   | 1.12                                                         | 90 %         | 4         |
| P25-coated Flammulina | photocatalytic degradation    | 5                                           | 1                                   | ~ 1.0                                                        | 78 %         | 5         |
| Zr-Fc MOF             | Photo-Fenton reaction         | 10                                          | 1                                   | 1.53                                                         | ~ 95 %       | 6         |
| TiO <sub>2-x</sub>    | photocatalytic degradation    | 10                                          | 1                                   | 1.05                                                         | 95 %         | 7         |
| Peroxymonosulfate     | Photo-Fenton reaction         | 10                                          | 1                                   | 1.14                                                         | 96 %         | 8         |
| CuFeMnO <sub>4</sub>  | Photo-Fenton reaction         | 100                                         | 1                                   | 1.78                                                         | 87 %         | 9         |
| Alginate              | Solution-diffusion separation | 100                                         | 1                                   | 1.4                                                          | 99 %         | 10        |
| Polyamide             | Molecular sieving separation  | 200                                         | 1                                   | 1.02                                                         | 98 %         | This work |

### Supporting References

1. L. Zhang, R. Zhang, M. Ji, Y. Lu, Y. Zhu, J. Jin, *J. Membr. Sci.*, 2021, **636**, 119478.
2. O. Coronell, B. J. Mariñas, D. G. Cahill, *Environ. Sci. Technol.*, 2011, **45**, 4513-4520.
3. R. Chen, T. Zhang, J. Kim, H. Peng, M. Ye, C.-H. Huang, *Environ. Sci. Technol.*, 2021, **55**, 6248-6256.
4. D. Qi, Y. Liu, Y. Liu, Z. Liu, Y. Luo, H. Xu, X. Zhou, J. Zhang, H. Yang, W. Wang, *Adv. Mater.*, 2020, **32**, 2004401.

5. J. Deng, S. Xiao, B. Wang, Q. Li, G. Li, D. Zhang, H. Li, *ACS Appl. Mater. Interfaces*, 2020, **12**, 51537-51545.
6. X. Ma, Z. Deng, Z. Li, D. Chen, X. Wan, X. Wang, X. Peng, *J. Mater. Chem. A*, 2020, **8**, 22728-22735.
7. C. Song, D. Qi, Y. Han, Y. Xu, H. Xu, S. You, W. Wang, C. Wang, Y. Wei, J. Ma, *Environ. Sci. Technol.*, 2020, **54**, 9025-9033.
8. S. Zuo, D. Xia, Z. Guan, F. Yang, S. Cheng, H. Xu, R. Wan, D. Li, M. Liu, *Sep. Purif. Technol.*, 2021, **254**, 117611.
9. L. Shi, Y. Shi, S. Zhuo, C. Zhang, Y. Aldrees, S. Aleid, P. Wang, *Nano Energy*, 2019, **60**, 222-230.
10. P. Zhang, F. Zhao, W. Shi, H. Lu, X. Zhou, Y. Guo, G. Yu, *Adv. Mater.*, 2022, **34**, 2110548.
